# Supplementary material
Source: PubMed Central journal article supplement (PMC1266062)
Supplement: nar_33_18_5829__1.pdf [file nar_33_18_5829__1.pdf]

Supplement Material to Improvement in protein functional site prediction using all atom computational protein design

Table 1 Contributions from different sources of information on the accuracy of functional site prediction

| Model Name                                                                                          | Residual Deviance* |
|-----------------------------------------------------------------------------------------------------|--------------------|
| SCORECONS                                                                                           | 10802              |
| Natural/designed sequence profile difference                                                        | 12753              |
| Native-optimal residue energy difference                                                            | 12539              |
| SCORECONS + Profile Difference                                                                      | 10698              |
| SCORECONS + Native/optimal residue energy difference                                                | 10706              |
| SCORECONS + Natural/designed sequence profile difference + Native optimal residue energy difference | 10606              |

\*The residual deviance of different models were obtained using logistic regressions. Residual deviance represents the how good the model is for the data.

Table 2 The statistics of the combined model.

|                                              | Coefficient | Z value* | Pr(> z )** |
|----------------------------------------------|-------------|----------|------------|
| Scorecons score                              | 6.0         | 38       | <2e-16     |
| Natural/designed sequence profile difference | 1.0         | 9.5      | <2e-16     |
| Native/optimal residue energy difference     | 0.18        | 9.7      | <2e-16     |

\*Z value is from Ward test which represent the significance of the coefficient.

\*\*Pr(Z) is the probability of the coefficient is random according to the Z value..
